# Supplementary material for: Challenges in Gene Therapy for Somatic Reverted Mosaicism in X-Linked Combined Immunodeficiency by CRISPR/Cas9 and Prime Editing
Source: MDPI journal article supplement (doi:10.3390/genes13122348), 2022-12-13
Supplement: s1 [file s1]

**Table S1:** sgRNA sequence

| Gene         |         | Sequence (5'→3')                          |
|--------------|---------|-------------------------------------------|
| <i>IL2RG</i> | sgRNA 1 | ACATATCTCCAGTGATCCCC <b>TGG</b>           |
|              | sgRNA 2 | TTAGGTTCTCTGGAGCCCAG <b>GGG</b>           |
|              | sgRNA 3 | TAGGTTCTCTGGAGCCCAGG <b>GGG</b>           |
|              | sgRNA 4 | TCTGGAGCCCAGGGG <b>G</b> TCACT <b>TGG</b> |
|              | sgRNA 5 | TCTGGAGCCCAGGGGATCACT <b>TGG</b>          |
|              | sgRNA 6 | GGTGCAGTACCGGACTGACT <b>GGG</b>           |
| <i>TRAC</i>  |         | GAGAATCAAAATCGGTGAAT <b>AAA</b>           |

\* Underline base in sgRNAs of *IL2RG* correspond to mutation; last three nucleotides marked in red is PAM.

**Table S2:** ssODN sequence

|         | Sequence (5'→3')                                                                                                                                         | Aim                    | Size   |
|---------|----------------------------------------------------------------------------------------------------------------------------------------------------------|------------------------|--------|
| ssODN 1 | A*T*C*CTGACTTGTCTAGGCCAGGGGAATGACCACAT<br>ATGCACACATATCTCCAGTGA <b>CCCCCTGGGCTCCAGA</b><br>GAACCTAACACTTCACAACTGAGTGAATCCCAGCTA<br>GAACTGAACTGGAA*C*A*A  | inducing<br>mutation   | 126 nt |
| ssODN 2 | C*C*A*GGGAATGACCACATATGCACACATATCTCCA<br>GTGA <b>ACCCTGGGCTCCAGAGAACCTAACACTTCACA</b><br>AACT*G*A*G                                                      | inducing<br>mutation   | 79 nt  |
| ssODN 3 | A*G*G*AGGTATTAGGGGCACTACCTTCAGGATCCTGA<br>CTTGTCTAGGCCAGGGGAATGACCACATATGCACACA<br>TATCTCCAGTGA <b>TCCCCTGGGCTCCAGAGAACCTAAC</b><br>ACTTCACAACTGAG*T*G*A | correcting<br>mutation | 127 nt |
| ssODN 4 | A*T*C*CTGACTTGTCTAGGCCAGGGGAATGACCACAT<br>ATGCACACATATCTCCAGTGA <b>TCCCCTGGGCTCCAGA</b><br>GAACCTAACACTTCACAACTGAGTGAATCCCAGCTA<br>GAACTGAACTGGAA*C*A*A  | correcting<br>mutation | 126 nt |

\* The marked nucleotides in green aim to correct the mutation, whilst the red ones aim to induce mutation. All of ssODNs were chemically modified by incorporating of 3'phosphonothioate 2'-O-methyl in three terminal nucleotides at both 5' and 3' ends.

**Table S3:** pegRNA sequence

|          | Sequence (5'→3')                                                                                                                                      | Aim                    | Size   |
|----------|-------------------------------------------------------------------------------------------------------------------------------------------------------|------------------------|--------|
| pegRNA 1 | U*U*A*GGUUCUCUGGAGCCCAGGUUUUAGAGCUAG<br>AAAUAGCAAGUUAAAAUAAGGCUAGUCCGUUAUC<br>AACUUGAAAAAGUGGCACCGAGUCGGUGCAGUG<br>A <b>CCCCUGGGCUCCAGAG</b> *A*A*C   | inducing<br>mutation   | 121 nt |
| pegRNA 2 | U*A*G*GUUCUCUGGAGCCCAGGGUUUUAGAGCUAG<br>AAAUAGCAAGUUAAAAUAAGGCUAGUCCGUUAUC<br>AACUUGAAAAAGUGGCACCGAGUCGGUGCUCCA<br>GUGA <b>UCCCCUGGGCUCCAG</b> *A*G*A | correcting<br>mutation | 122 nt |

\* The marked nucleotides in red aim to induce mutation and green one aims to correct mutation. Two pegRNAs were chemically modified by incorporating of 3'phosphonothioate 2'-O-methyl in three terminal nucleotides at both 5' and 3' ends.

**Table S4:** Primer sequence

| Gene         | Item    | Sequence (5'→3')      | Amplicon length | Source             |
|--------------|---------|-----------------------|-----------------|--------------------|
| <i>IL2RG</i> | Forward | AGGCCACACAGATGCTAAACT | 409 bp          | own design         |
|              | Reverse | TGCTACATTACGTCCCTAGT  |                 |                    |
| <i>TRAC</i>  | Forward | ATCACGAGCAGCTGGTTTCT  | 636 bp          | Osborn et al. [28] |
|              | Reverse | CCCGTGTCAATTCTCTGGACT |                 |                    |

**Table S5:** Sequence of primers and probes for ddPCR assay

| Gene         |                   | Sequence (5'→3')                            |
|--------------|-------------------|---------------------------------------------|
| <i>IL2RG</i> | Forward primer    | TATTAGGGGCACTACCTTC                         |
|              | Reverse primer    | TTGTGAAGTGTTAGGTTCTC                        |
|              | Edited Probe      | /6FAM CCAGGGGATCACTGGA /3IABkFQ/            |
|              | Native Dark Probe | CCAGGGGGTCACTGGA                            |
| <i>RPP30</i> | Forward primer    | AGATTGGACCTGCGAGCG                          |
|              | Reverse primer    | GAGCGGCTGTCTCCACAAGT                        |
|              | Probe             | /5HEX TTCTGACCT/ZEN/GAAGGCTCTGCGCG/3IABkFQ/ |

\*Edited probe of *IL2RG* gene targets wild-type sequence while native dark probe binds mutant sequence.
